# Supplementary material for: Cardiolipin content, linoleic acid composition, and tafazzin expression in response to skeletal muscle overload and unload stimuli
Source: PubMed Central journal article supplement (PMC5435726; doi:10.1038/s41598-017-02089-1), 2017-05-17
Supplement: 41598_2017_2089_MOESM1_ESM.pdf [file 41598_2017_2089_MOESM1_ESM.pdf]

## SUPPLEMENTAL INFORMATION

### **Cardiolipin content, linoleic acid composition, and tafazzin expression in response to skeletal muscle overload and unload stimuli**

Val A. Fajardo, John S. Mikhaeil, Cameron Leveille, Caitlin Saint, Paul J. LeBlanc\*

Department of Health Sciences, Brock University, St. Catharines, Ontario, Canada

Running head: Cardiolipin remodeling in skeletal muscle

\*Corresponding author:

Dr. Paul J. LeBlanc

Department of Health Sciences,

Brock University

St. Catharines, ON

N2L 3G1

905-688-5550 ext. 4216

[pleblanc@brocku.ca](mailto:pleblanc@brocku.ca)

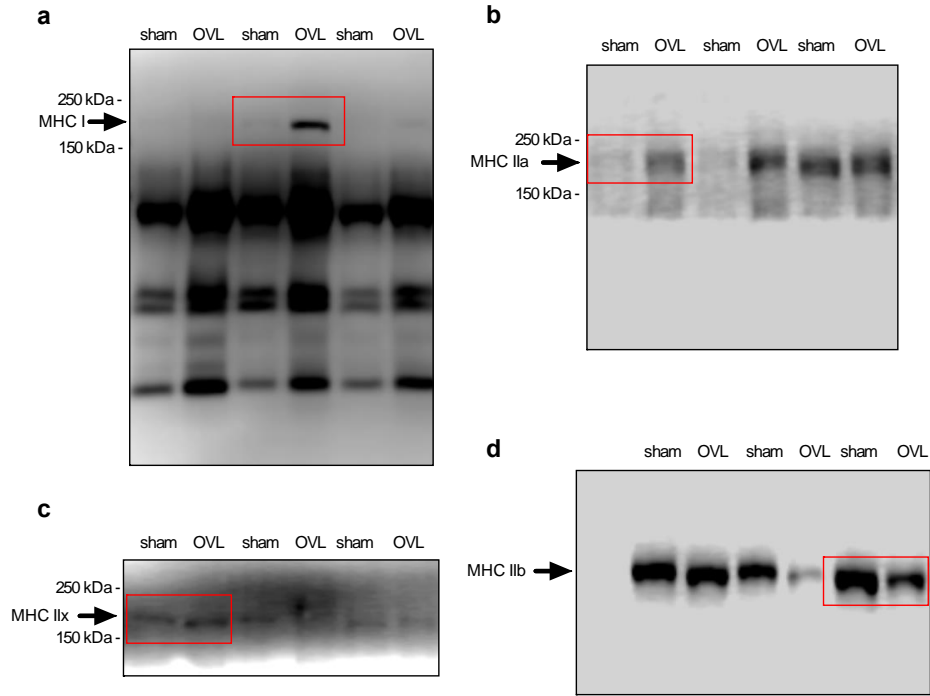

**Supplemental Figure S1. Full-length Western blots for MHC I (a), MHC IIa (b), MHC IIx (c), and MHC IIb (d) from Figure 1. For b-d the PVDF membrane was cut to only incorporate proteins from >150 kDa.**

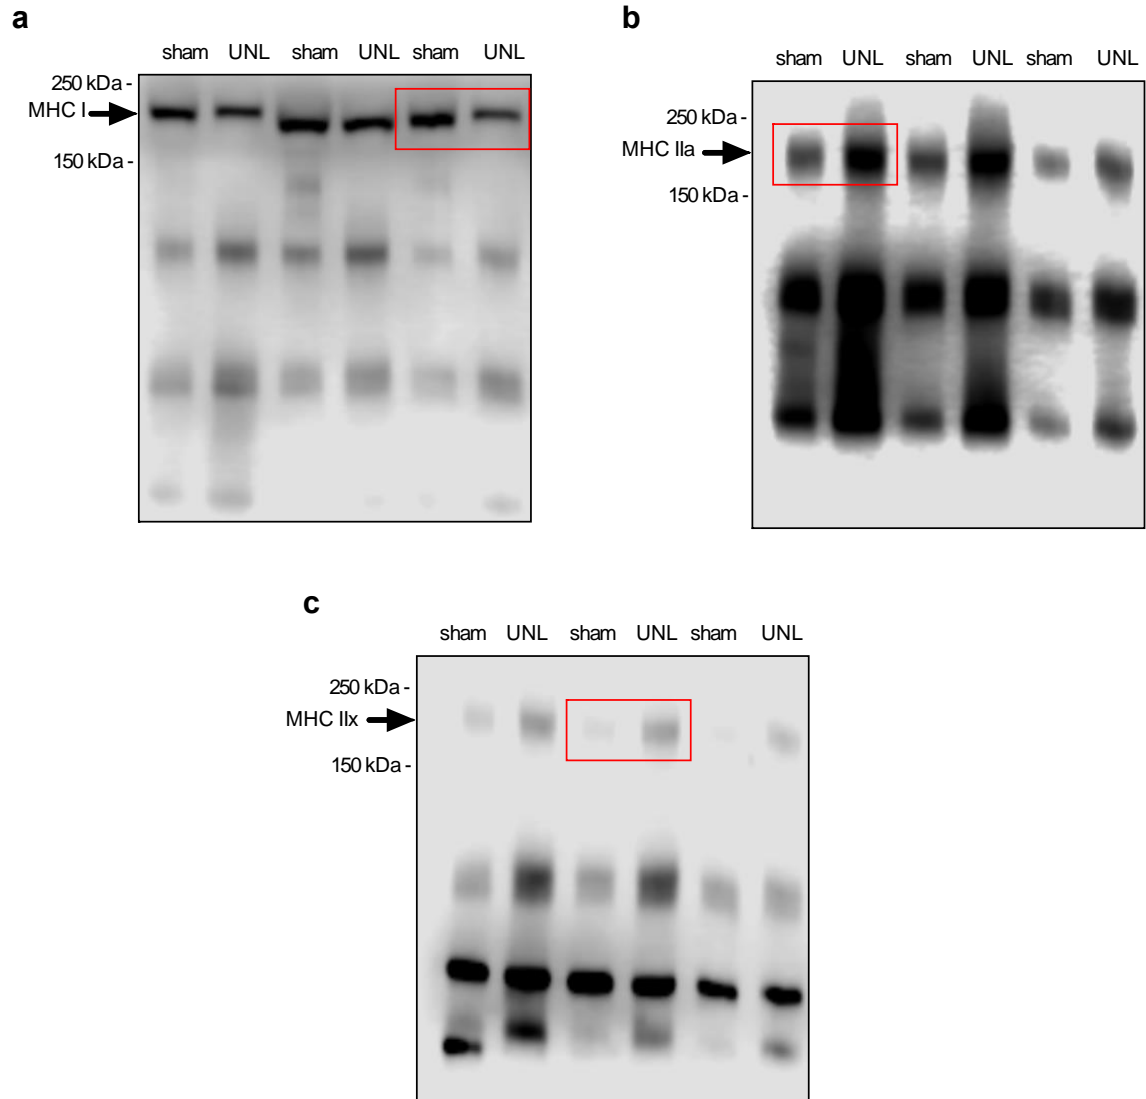

**Supplemental Figure S2. Full-length Western blots for MHC I (a), MHC IIa (b), and MHC IIx (c) from Figure 2.**

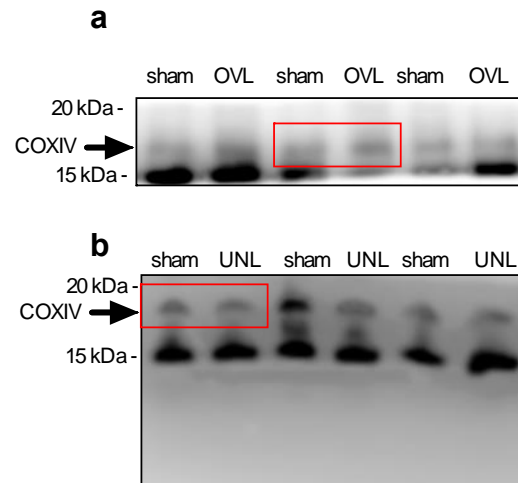

**Supplemental Figure S3. Full length Western blots for COXIV in sham vs overloaded plantaris (a), and sham vs unloaded soleus (b) from Figure 3.** For (a) the PVDF membrane was cut into a strip containing proteins from 15-20 kDa, whereas for (b) the PVDF membrane was cut to incorporate all proteins below 20 kDa. COXIV was recognized as a 17 kDa protein.

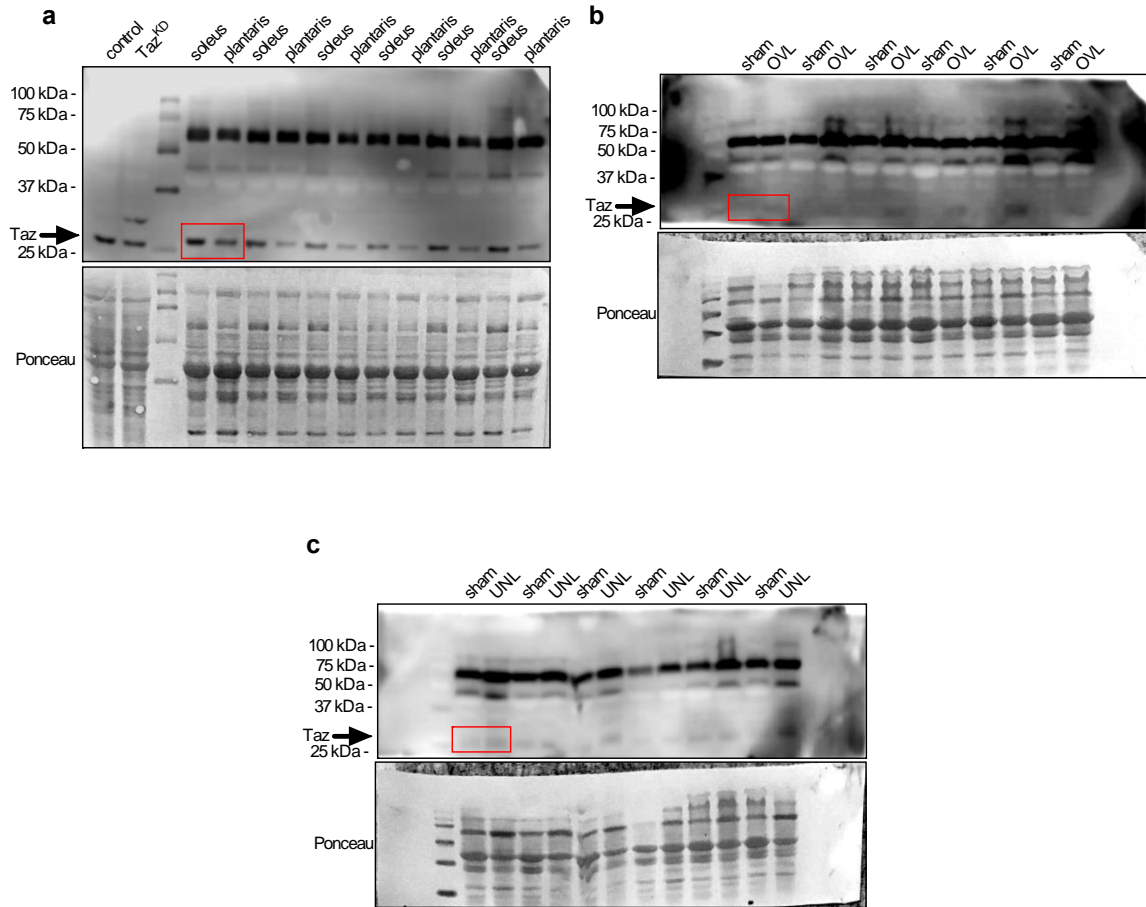

**Supplemental Figure S4. Full-length Western blots for tafazzin (Taz) from Figure 5.** For (a), the control and tafazzin knockdown (Taz<sup>KD</sup>) cells were a kind gift from Dr. Aaron Schimmer (University of Toronto). Taz was recognized as a 27 kDa protein.
